# Supplementary material
Source: MDPI journal article supplement (https://www.mdpi.com/2079-9276/12/12/142)
Supplement: s1 [file s1]

**Supplementary Table S1: List of various parameters are changed during the SWAT model Flow, Sediment, Phosphorus calibration with existing BMPs.**

| Parameter Type | Parameter | File Type | Description                                                                                                                   | Default Value | Model Range  | Wigle Creek |
|----------------|-----------|-----------|-------------------------------------------------------------------------------------------------------------------------------|---------------|--------------|-------------|
| Snow           | SMTMP     | .bsn      | Snow melt base temperature (°C)                                                                                               | 0.5           | -5 to 5      | 0.97        |
| Snow           | SFTMP     | .bsn      | Snowfall temperature (°C)                                                                                                     | 1             | -5 to 5      | -1.93       |
| Snow           | SMFMX     | .bsn      | Maximum melt factor for snow on June 21 (mm H <sub>2</sub> O °C <sup>-1</sup> day <sup>-1</sup> )                             | 4.5           | 1.4 to 6.9   | 4.14        |
| Snow           | SMFMN     | .bsn      | Minimum melt factor for snow on December 21 (mm H <sub>2</sub> O °C <sup>-1</sup> day <sup>-1</sup> )                         | 4.5           | 1.4 to 6.9   | 2.61        |
| Snow           | SNOCOV MX | .bsn      | Minimum snow water content that corresponds to 100% snow cover (mm H <sub>2</sub> O)                                          | 1             | 0 to 500     | 4.85        |
| Snow           | SNO50COV  | .bsn      | Fraction of snow volume that corresponds to 50% snow cover                                                                    | 0.5           | 0.01 to 0.99 | 0.18        |
| Snow           | TIMP      | .bsn      | Snow pack temperature lag factor                                                                                              | 1             | 0.01 to 1    | 0.91        |
| Hydrology      | ESCO      | .hru      | Soil Evaporation compensation factor                                                                                          | 0.95          | 0 to 1       | 0.66        |
| Hydrology      | EPCO      | .hru      | Plant uptake compensation factor                                                                                              | 1             | 0 to 1       | 0.76        |
| Hydrology      | CH_N2     | .rte      | Manning's coefficient for the main channel                                                                                    | 0.014         | -0.01 to 0.3 | 0.083       |
| Hydrology      | CH_K2     | .rte      | Effective hydraulic conductivity in main channel alluvium (mm/hr)                                                             | 0             | -0.01 to 500 | 1.6         |
| Hydrology      | SURLAG    | .hru      | Surface runoff lag coefficient                                                                                                | 2             | 0 to 24      | 2.6         |
| Hydrology      | GWQMN     | .gw       | Threshold depth of water in the shallow aquifer required for return flow to occur (mm H <sub>2</sub> O)                       | 1000          | 0 to 5000    | 859         |
| Hydrology      | RCHRG_DP  | .gw       | Deep aquifer percolation fraction                                                                                             | 0             | 0 to 1       | 0.24        |
| Hydrology      | GW_DELAY  | .gw       | Groundwater delay time (days)                                                                                                 | 31            | 0 to 2000    | 31.5        |
| Hydrology      | GW_REVAP  | .gw       | Groundwater "revap" coefficient                                                                                               | 0.02          | 0.02 to 0.2  | 0.084       |
| Hydrology      | ALPHA_BF  | .gw       | Baseflow alpha factor                                                                                                         | 0.048         | 0 to 1       | 0.041       |
| Hydrology      | REVAPMN   | .gw       | Threshold depth of water in the shallow aquifer for "revap" or percolation to the deep aquifer to occur (mm H <sub>2</sub> O) | 750           | 200 to 500   | 416.75      |

**Supplementary Table S1: List of various parameters are changed during the SWAT model Flow, Sediment, Phosphorus calibration with existing BMPs.**

|               |                  |            |                                                                                                                         |        |                |        |
|---------------|------------------|------------|-------------------------------------------------------------------------------------------------------------------------|--------|----------------|--------|
| Hydrology     | SOL_AWC          | .sol       | Available water capacity of the soil layer (mm H <sub>2</sub> O/mm soil)                                                | Varies | -0.1 to 0.1*   | 0.09*  |
| Hydrology     | SOL_K            | .sol       | Saturated hydraulic conductivity (mm/hr)                                                                                | varies | -0.1 to 0.1*   | -0.06* |
| Tile Drainage | DEP_IMP          | .hru       | Depth to impervious layer in agricultural fields (mm)                                                                   | 6000   | 0 to 6000      | 2100   |
| Tile Drainage | DEP_IMP          | .hru       | Depth to impervious layer in non-agricultural fields (mm)                                                               | 6000   | 0 to 6000      | 6000   |
| Tile Drainage | DDRAIN           | .mgt       | Depth to drains (mm); must be >0 to initiate tile drainage                                                              | 0      | 0 to 2000      | 900    |
| Tile Drainage | TDRAIN           | .mgt       | Time to drain soil to field capacity (hours)                                                                            | 0      | 0 to 2000      | 48     |
| Tile Drainage | GDRAIN           | .mgt       | Drain tile lag time (hours)                                                                                             | 0      | 0 to 2000      | 24     |
| Sediment      | SPCON            | .bsn       | Linear parameter for calculating the maximum amount of sediment that can be reentrained during channel sediment routing | 0.0001 | 0.0001 to 0.01 | 0.003  |
| Sediment      | SPEXP            | .bsn       | Exponent parameter for calculating sediment reentrained in channel sediment routing                                     | 1      | 1.0 to 1.5     | 1.1    |
| Sediment      | ADJ_PKR          | .bsn       | Peak rate adjustment factor for sediment routing in the subbasin (tributary channels)                                   | 1      | 0.5 to 2       | 0.97   |
| Sediment      | PRF_BSN          | .bsn       | Peak rate adjustment factor for sediment routing in the main channel                                                    | 1      | 0 to 2         | 1.54   |
| Sediment      | CH_COV1          | .rte       | Channel erodibility factor                                                                                              | 0      | -0.05 to 0.6   | 0.41   |
| Sediment      | CH_COV2          | .rte       | Channel cover factor                                                                                                    | 0      | -0.001 to 1    | 0.51   |
| Sediment      | CH_ERODMO (1-12) | .rte       | Monthly channel erodibility factor                                                                                      | 0      | 0 to 1         | Varies |
| Sediment      | USLE_K           | .sol       | USLE equation soil erodibility (K) factor                                                                               | Varies | -0.1 to 0.1*   | 0.028* |
| Sediment      | USLE_C           | .plant.dat | Minimum value of USLE C factor for water erosion applicable to the land cover/plant                                     | Varies | -0.1 to 0.1*   | -0.04* |
| Phosphorus    | SOL_P_MODEL      | .bsn       | Soil Phosphorus Model (0=original; 1 = new soil P model)                                                                | 0      | 0 or 1         | 1      |

**Supplementary Table S1: List of various parameters are changed during the SWAT model Flow, Sediment, Phosphorus calibration with existing BMPs.**

|                                                                                                        |
|--------------------------------------------------------------------------------------------------------|
| *Relative changes based on % (-0.1 to 0.1 is a relative change of -10% to +10% of the parameter value) |
|--------------------------------------------------------------------------------------------------------|
